# Supplementary material for: Successful Implementation of a Multicountry Clinical Surveillance and Data Collection System for Ebola Virus Disease in West Africa: Findings and Lessons Learned
Source: PubMed Central journal article supplement (PMC5042696; doi:10.9745/ghsp-d-16-00186), 2016-09-28
Supplement: 16-00186-Levine-Supplementary-Material-2.pdf [file 16-00186-Levine-Supplementary-Material-2.pdf]

**Supplemental Appendix 2. Clinical Forms**

Table of Contents .....1

Liberia Forms .....2

    Viral Hemorrhagic Fever Case Investigation Form .....2

    Rounding Form .....6

    Treatment Form .....7

    Laboratory Form .....8

Sierra Leone Forms .....9

    Triage Form .....9

    Patient Tracking Form .....11

    Drug Request Form .....12

    Lab Request Form .....13

    Rounding Form .....14

    Nurse Inpatient Rounding Form .....16

    Treatment Form .....17

    Discharge Form .....19

# LIBERIA VIRAL HEMORRHAGIC FEVER CASE INVESTIGATION FORM

Outbreak Case ID:

Health Facility Case ID:

Date of Case Report: \_\_\_/\_\_\_/\_\_\_ (D, M, Yr)

## Section 1. Patient Information

Patient's Surname: \_\_\_\_\_ Other Names: \_\_\_\_\_ Age: \_\_\_\_\_  Years  Months  
 Gender:  Male  Female Phone Number of Patient/Family Member: \_\_\_\_\_ Owner of Phone: \_\_\_\_\_

Status of Patient at Time of This Case Report:  Alive  Dead *If dead, Date of Death: \_\_\_/\_\_\_/\_\_\_ (D, M, Yr)*

Permanent Residence:  
 Head of Household: \_\_\_\_\_ Village/Town: \_\_\_\_\_  
 Country of Residence: \_\_\_\_\_ County: \_\_\_\_\_ District: \_\_\_\_\_

Occupation:  
 Farmer  Butcher  Hunter/trader of game meat  Miner  Religious leader  Housewife  Pupil/student  Child  
 Businessman/woman; type of business: \_\_\_\_\_  Transporter; type of transport: \_\_\_\_\_  
 Healthcare worker; position: \_\_\_\_\_ healthcare facility: \_\_\_\_\_  Traditional/spiritual healer  
 Other; please specify occupation: \_\_\_\_\_

Location Where Patient Became Ill:  
 Village/Town: \_\_\_\_\_ County: \_\_\_\_\_ District: \_\_\_\_\_  
 GPS Coordinates at House: latitude: \_\_\_\_\_ longitude: \_\_\_\_\_  
*If different from permanent residence, Dates residing at this location: \_\_\_/\_\_\_/\_\_\_ - \_\_\_/\_\_\_/\_\_\_ (D, M, Yr)*

## Section 2. Clinical Signs and Symptoms

Date of Initial Symptom Onset: \_\_\_/\_\_\_/\_\_\_ (D, M, Yr)

Please tick an answer for ALL symptoms indicating if they occurred during this illness between symptom onset and case detection:

- Fever  Yes  No  Unk  
*If yes, Temp: \_\_\_° C Source:  Axillary  Oral  Rectal*
- Vomiting/nausea  Yes  No  Unk
- Diarrhea  Yes  No  Unk
- Intense fatigue/general weakness  Yes  No  Unk
- Anorexia/loss of appetite  Yes  No  Unk
- Abdominal pain  Yes  No  Unk
- Chest pain  Yes  No  Unk
- Muscle pain  Yes  No  Unk
- Joint pain  Yes  No  Unk
- Headache  Yes  No  Unk
- Cough  Yes  No  Unk
- Difficulty breathing  Yes  No  Unk
- Difficulty swallowing  Yes  No  Unk
- Sore throat  Yes  No  Unk
- Jaundice (yellow eyes/gums/skin)  Yes  No  Unk
- Conjunctivitis (red eyes)  Yes  No  Unk
- Skin rash  Yes  No  Unk
- Hiccups  Yes  No  Unk
- Pain behind eyes/sensitive to light  Yes  No  Unk
- Coma/unconscious  Yes  No  Unk
- Confused or disoriented  Yes  No  Unk

- Unexplained bleeding from any site  Yes  No  Unk
- If Yes:*
- Bleeding of the gums  Yes  No  Unk
  - Bleeding from injection site  Yes  No  Unk
  - Nose bleed (epistaxis)  Yes  No  Unk
  - Bloody or black stools (melena)  Yes  No  Unk
  - Fresh/red blood in vomit (hematemesis)  Yes  No  Unk
  - Digested blood/"coffee grounds" in vomit  Yes  No  Unk
  - Coughing up blood (hemoptysis)  Yes  No  Unk
  - Bleeding from vagina, other than menstruation  Yes  No  Unk
  - Bruising of the skin (petechiae/ecchymosis)  Yes  No  Unk
  - Blood in urine (hematuria)  Yes  No  Unk
  - Other hemorrhagic symptoms  Yes  No  Unk  
*If yes, please specify: \_\_\_\_\_*

Other non-hemorrhagic clinical symptoms:  Yes  No  Unk  
*If yes, please specify: \_\_\_\_\_*

## Section 3. Hospitalization Information

At the time of this case report, is the patient hospitalized or currently being admitted to the hospital?  Yes  No

*If yes, Date of Hospital Admission: \_\_\_/\_\_\_/\_\_\_ (D, M, Yr) Health Facility Name: \_\_\_\_\_  
 Village/Town: \_\_\_\_\_ County: \_\_\_\_\_ District: \_\_\_\_\_*

Is the patient in isolation or currently being placed there?  Yes  No *If yes, date of isolation: \_\_\_/\_\_\_/\_\_\_ (D, M, Yr)*

Was the patient hospitalized or did he/she visit a health clinic previously for this illness?  Yes  No  Unk

*If yes, please complete a line of information for each previous hospitalization:*

| Dates of Hospitalization             | Health Facility Name | Village | County | Was the patient isolated?                                   |
|--------------------------------------|----------------------|---------|--------|-------------------------------------------------------------|
| ___/___/___ - ___/___/___ (D, M, Yr) |                      |         |        | <input type="checkbox"/> Yes<br><input type="checkbox"/> No |
| ___/___/___ - ___/___/___ (D, M, Yr) |                      |         |        | <input type="checkbox"/> Yes<br><input type="checkbox"/> No |

Case Name:

Outbreak Case ID:

**Section 4. Epidemiological Risk Factors and Exposures**

**IN THE PAST ONE(1) MONTH PRIOR TO SYMPTOM ONSET:**

1. Did the patient have contact with a known or suspect case, or with any sick person before becoming ill?  Yes  No  Unk

If yes, please complete one line of information for each sick source case:

| Name of Source Case | Relation to Patient | Dates of Exposure (D, M, Yr) | Village | County | Was the person dead or alive ?                                                                        | Contact Types** |
|---------------------|---------------------|------------------------------|---------|--------|-------------------------------------------------------------------------------------------------------|-----------------|
|                     |                     | ___/___/___ - ___/___/___    |         |        | <input type="checkbox"/> Alive<br><input type="checkbox"/> Dead, date of death: ___/___/___ (D, M, Y) |                 |
|                     |                     | ___/___/___ - ___/___/___    |         |        | <input type="checkbox"/> Alive<br><input type="checkbox"/> Dead, date of death: ___/___/___ (D, M, Y) |                 |
|                     |                     | ___/___/___ - ___/___/___    |         |        | <input type="checkbox"/> Alive<br><input type="checkbox"/> Dead, date of death: ___/___/___ (D, M, Y) |                 |

- \*\*Contact Types:** (list all that apply)
- 1 - Touched the body fluids of the case (blood, vomit, saliva, urine, feces)
  - 2 - Had direct physical contact with the body of the case (alive or dead)
  - 3 - Touched or shared the linens, clothes, or dishes/eating utensils of the case
  - 4 - Slept, ate, or spent time in the same household or room as the case

2. Did the patient attend a funeral before becoming ill?  Yes  No  Unk

If yes, please complete one line of information for each funeral attended:

| Name of Deceased Person | Relation to Patient | Dates of Funeral Attendance (D, M, Yr) | Village | County | Did the patient participate (carry or touch the body)?   |
|-------------------------|---------------------|----------------------------------------|---------|--------|----------------------------------------------------------|
|                         |                     | ___/___/___ - ___/___/___              |         |        | <input type="checkbox"/> Yes <input type="checkbox"/> No |
|                         |                     | ___/___/___ - ___/___/___              |         |        | <input type="checkbox"/> Yes <input type="checkbox"/> No |

3. Did the patient travel outside their home or village/town before becoming ill?  Yes  No  Unk

If yes, Village: \_\_\_\_\_ County: \_\_\_\_\_ Date(s): \_\_\_/\_\_\_/\_\_\_ - \_\_\_/\_\_\_/\_\_\_ (D, M, Yr)

4. Was the patient hospitalized or did he/she go to a clinic or visit anyone in the hospital before this illness?  Yes  No  Unk

If yes, Patient Visited: \_\_\_\_\_ Date(s): \_\_\_/\_\_\_/\_\_\_ - \_\_\_/\_\_\_/\_\_\_ (D, M, Yr)

Health Facility Name: \_\_\_\_\_ Village: \_\_\_\_\_ County: \_\_\_\_\_

5. Did the patient consult a traditional/spiritual healer before becoming ill?  Yes  No  Unk

If yes, Name of Healer: \_\_\_\_\_ Village: \_\_\_\_\_ County: \_\_\_\_\_ Date: \_\_\_/\_\_\_/\_\_\_ (D, M, Yr)

6. Did the patient have direct contact (hunt, touch, eat) with animals or uncooked meat before becoming ill?  Yes  No  Unk

If yes, please tick all that apply:

- |                                                        |                                                                     |
|--------------------------------------------------------|---------------------------------------------------------------------|
| <b>Animal:</b>                                         | <b>Status (check one only):</b>                                     |
| <input type="checkbox"/> Bats or bat feces/urine       | <input type="checkbox"/> Healthy <input type="checkbox"/> Sick/Dead |
| <input type="checkbox"/> Primates (monkeys)            | <input type="checkbox"/> Healthy <input type="checkbox"/> Sick/Dead |
| <input type="checkbox"/> Rodents or rodent feces/urine | <input type="checkbox"/> Healthy <input type="checkbox"/> Sick/Dead |
| <input type="checkbox"/> Pigs                          | <input type="checkbox"/> Healthy <input type="checkbox"/> Sick/Dead |
| <input type="checkbox"/> Chickens or wild birds        | <input type="checkbox"/> Healthy <input type="checkbox"/> Sick/Dead |
| <input type="checkbox"/> Cows, goats, or sheep         | <input type="checkbox"/> Healthy <input type="checkbox"/> Sick/Dead |
| <input type="checkbox"/> Other; specify _____          | <input type="checkbox"/> Healthy <input type="checkbox"/> Sick/Dead |

7. Did the patient get bitten by a tick in the past 2 weeks?  Yes  No  Unk

**Section 6. Case Report Form Completed by:**

Name: \_\_\_\_\_ Phone: \_\_\_\_\_ E-mail: \_\_\_\_\_

Position: \_\_\_\_\_ County: \_\_\_\_\_ Health Facility: \_\_\_\_\_

Information provided by:  Patient  Proxy; If proxy, Name: \_\_\_\_\_ Relation to Patient: \_\_\_\_\_

Case Name:

Cutbreak Case ID:

**\*\*If the patient is deceased or has already recovered from illness, please fill out the next section.**

**\*\*If the patient is currently admitted to the hospital, leave the next section blank (it will be completed upon discharge)**

### Section 7. Patient Outcome Information

Please fill out this section at the time of patient recovery and discharge from the hospital OR at the time of patient death.

Date Outcome Information Completed: \_\_\_/\_\_\_/\_\_\_ (D, M, Yr)

Final Status of the Patient:  Alive  Dead

Did the patient have signs of unexplained bleeding at any time during their illness?  Yes  No  Unk

If yes, please specify: \_\_\_\_\_

If the patient has recovered and been discharged from the hospital:

Name of hospital discharged from: \_\_\_\_\_ County: \_\_\_\_\_

If the patient was isolated, Date of discharge from the isolation ward: \_\_\_/\_\_\_/\_\_\_ (D, M, Yr)

Date of discharge from the hospital: \_\_\_/\_\_\_/\_\_\_ (D, M, Yr)

If the patient is dead:

Date of Death: \_\_\_/\_\_\_/\_\_\_ (D, M, Yr)

Place of Death:  Community  Hospital  Other: \_\_\_\_\_

Village: \_\_\_\_\_ County: \_\_\_\_\_ District: \_\_\_\_\_

Date of Funeral/Burial: \_\_\_/\_\_\_/\_\_\_ (D, M, Yr) Funeral conducted by:  Family/community  Outbreak burial team

Place of Funeral/Burial:

Village: \_\_\_\_\_ County: \_\_\_\_\_ District: \_\_\_\_\_

Please tick an answer for ALL symptoms indicating if they occurred at any time during this illness including during hospitalization:

Fever  Yes  No  Unk

If yes, Temp: \_\_\_° C Source:  Axillary  Oral  Rectal

Vomiting/nausea  Yes  No  Unk

Diarrhea  Yes  No  Unk

Intense fatigue/general weakness  Yes  No  Unk

Anorexia/loss of appetite  Yes  No  Unk

Abdominal pain  Yes  No  Unk

Chest pain  Yes  No  Unk

Muscle pain  Yes  No  Unk

Joint pain  Yes  No  Unk

Headache  Yes  No  Unk

Cough  Yes  No  Unk

Difficulty breathing  Yes  No  Unk

Difficulty swallowing  Yes  No  Unk

Sore throat  Yes  No  Unk

Jaundice (yellow eyes/gums/skin)  Yes  No  Unk

Conjunctivitis (red eyes)  Yes  No  Unk

Skin rash  Yes  No  Unk

Hiccups  Yes  No  Unk

Pain behind eyes/sensitive to light  Yes  No  Unk

Coma/unconscious  Yes  No  Unk

Confused or disoriented  Yes  No  Unk

Other non-hemorrhagic clinical symptoms:  Yes  No  Unk

If yes, please specify: \_\_\_\_\_

Final Diagnosis

Confirmed \_\_\_ Suspect \_\_\_ Probable \_\_\_ Negative \_\_\_

If not Ebola, what is the diagnosis?

Final Outcome

Died \_\_\_ Discharged \_\_\_ Transferred \_\_\_ Fled \_\_\_

In case of death, who performed the burial? \_\_\_\_\_

Comments:

**Formulary**

**Amoxicillin:** Children: 20mg/kg PO twice daily for 5 days.

**Cefixime:** Adults 400mg PO once daily for 5 days. Children: 8mg/kg solution PO once daily for 5 days.

**Ceftriaxone:** Adults: 1000mg IV once daily for five days. Children: 50mg/kg IV once daily for 5 days.

**Chlorpromazine:** Adults: 50mg PO three times daily as needed.

**Ciprofloxacin:** Adults: 500mg PO twice daily for five days.

**Coartem:**

- a. Adults (>35kg): 4 tablets by mouth twice daily for 3 days
- b. Children (25-34kg): 3 tablets by mouth twice daily for 3 days
- c. Children (15-24kg): 2 tablets by mouth twice daily for 3 days
- d. Children (5-14kg): 1 tablet by mouth twice daily for 3 days

**Haloperidol:** Adults: 5mg IV as needed.

**Diazepam:** Adults: 5mg by mouth 3 times a day as needed.

**Lorazepam:** Adults: 1mg IV as needed. Children: 0.05mg/kg IV as needed.

**Metoclopramide:** Adults 10mg PO/IV 4 times daily for nausea. Children: 0.1mg/kg PO/IV 4 times daily for nausea.

**Morphine Sulfate:** Adults: 10mg by mouth 4 times per day as needed (can be increased to 20mg or even 30mg if needed for pain). Children: morphine sulfate 0.3mg/kg by mouth 4 times per day as needed for pain (can be increased to 0.5mg/kg).

**Morphine hydrochloride:** 0.1mg/kg IV 4 times per day as needed for both adults and children

**Omeprazole:** Adults + Children > 20kg: 20mg by mouth once daily. Children < 20kg: omeprazole 10mg (half capsule) by mouth once daily (mix in water)

**ORS:** Adults: 1.5 liters per day of ORS by mouth. Children: 40cc/kg per day of ORS by mouth. Extra ORS for some dehydration: Adults: 3 liters of ORS by mouth over 4 hours. Children 5-14 years: 1.5 liters of ORS by mouth over 4 hours. Children < 5 years: 50ml/kg of ORS by mouth over 4 hours

**Paracetamol:** Adults: 1 gram by mouth 4 times daily. Children: 15mg/kg by mouth 4 times daily.

**Vitamin A:** > 12 mo: 200,000 IU by mouth once daily on days 1, 2, 8. Children 6-12mo: 100,000 IU by mouth once daily on days 1, 2, 8.

**Vitamin C:** Adults: 500mg by mouth 3 times per day. Children: 250mg by mouth 3 times per day.

**Zinc sulfate:** > 6 months: zinc sulfate 20mg tab once daily for 10 days. < 6 months: zinc sulfate 10mg tab once daily for 10 days.

Day 1 = day of admission. Check all symptoms that apply for each indicated day.

| Day:                                                         | 1        | 2        | 3        | 4        | 5        | 6        | 7        | 8        | 9        | 10        | 11        | 12        | 13        | 14        |
|--------------------------------------------------------------|----------|----------|----------|----------|----------|----------|----------|----------|----------|-----------|-----------|-----------|-----------|-----------|
| <b>General symptoms</b>                                      |          |          |          |          |          |          |          |          |          |           |           |           |           |           |
| Fever                                                        |          |          |          |          |          |          |          |          |          |           |           |           |           |           |
| Fatigue / asthenia / weakness                                |          |          |          |          |          |          |          |          |          |           |           |           |           |           |
| Muscle pain / Joint pain                                     |          |          |          |          |          |          |          |          |          |           |           |           |           |           |
| Headache                                                     |          |          |          |          |          |          |          |          |          |           |           |           |           |           |
| Non-haemorrhagic rash                                        |          |          |          |          |          |          |          |          |          |           |           |           |           |           |
| Hiccups                                                      |          |          |          |          |          |          |          |          |          |           |           |           |           |           |
| Anorexia (loss of appetite)                                  |          |          |          |          |          |          |          |          |          |           |           |           |           |           |
| Nausea                                                       |          |          |          |          |          |          |          |          |          |           |           |           |           |           |
| Vomiting                                                     |          |          |          |          |          |          |          |          |          |           |           |           |           |           |
| Dehydration                                                  |          |          |          |          |          |          |          |          |          |           |           |           |           |           |
| Oedema                                                       |          |          |          |          |          |          |          |          |          |           |           |           |           |           |
| Sore throat / Dysphagia                                      |          |          |          |          |          |          |          |          |          |           |           |           |           |           |
| Abdominal pain                                               |          |          |          |          |          |          |          |          |          |           |           |           |           |           |
| Abdominal tenderness                                         |          |          |          |          |          |          |          |          |          |           |           |           |           |           |
| RUQ pain                                                     |          |          |          |          |          |          |          |          |          |           |           |           |           |           |
| Diarrhea (non-bloody)                                        |          |          |          |          |          |          |          |          |          |           |           |           |           |           |
| Hepatomegaly                                                 |          |          |          |          |          |          |          |          |          |           |           |           |           |           |
| Splenomegaly                                                 |          |          |          |          |          |          |          |          |          |           |           |           |           |           |
| Jaundice                                                     |          |          |          |          |          |          |          |          |          |           |           |           |           |           |
| Anuria (unable to urinate)                                   |          |          |          |          |          |          |          |          |          |           |           |           |           |           |
| Dyspnea (breathlessness)                                     |          |          |          |          |          |          |          |          |          |           |           |           |           |           |
| Cough                                                        |          |          |          |          |          |          |          |          |          |           |           |           |           |           |
| Chest pain                                                   |          |          |          |          |          |          |          |          |          |           |           |           |           |           |
| Back pain                                                    |          |          |          |          |          |          |          |          |          |           |           |           |           |           |
| Disorientation                                               |          |          |          |          |          |          |          |          |          |           |           |           |           |           |
| Red eyes / conjunctivitis                                    |          |          |          |          |          |          |          |          |          |           |           |           |           |           |
| General other 1:<br>.....                                    |          |          |          |          |          |          |          |          |          |           |           |           |           |           |
| General other 2:<br>.....                                    |          |          |          |          |          |          |          |          |          |           |           |           |           |           |
| General other 3:<br>.....                                    |          |          |          |          |          |          |          |          |          |           |           |           |           |           |
| <b>Day:</b>                                                  | <b>1</b> | <b>2</b> | <b>3</b> | <b>4</b> | <b>5</b> | <b>6</b> | <b>7</b> | <b>8</b> | <b>9</b> | <b>10</b> | <b>11</b> | <b>12</b> | <b>13</b> | <b>14</b> |
| <b>Haemorrhagic symptoms</b>                                 |          |          |          |          |          |          |          |          |          |           |           |           |           |           |
| Petechiae / cutaneous bruising                               |          |          |          |          |          |          |          |          |          |           |           |           |           |           |
| Bleeding at injection site                                   |          |          |          |          |          |          |          |          |          |           |           |           |           |           |
| Bleeding gums                                                |          |          |          |          |          |          |          |          |          |           |           |           |           |           |
| Bloody/black diarrhea                                        |          |          |          |          |          |          |          |          |          |           |           |           |           |           |
| Haemetemesis (bloody vomit)                                  |          |          |          |          |          |          |          |          |          |           |           |           |           |           |
| Epistaxis (nose bleeds)                                      |          |          |          |          |          |          |          |          |          |           |           |           |           |           |
| Abnormal vaginal bleeding                                    |          |          |          |          |          |          |          |          |          |           |           |           |           |           |
| Haemoptysis (coughing blood)                                 |          |          |          |          |          |          |          |          |          |           |           |           |           |           |
| Haematoma (internal bleeding)                                |          |          |          |          |          |          |          |          |          |           |           |           |           |           |
| Haematuria (bloody urine)                                    |          |          |          |          |          |          |          |          |          |           |           |           |           |           |
| Conjunctival Haemorrhage<br>(bruising in white part of eyes) |          |          |          |          |          |          |          |          |          |           |           |           |           |           |
| Bloody other 1:<br>.....                                     |          |          |          |          |          |          |          |          |          |           |           |           |           |           |
| Bloody other 2:<br>.....                                     |          |          |          |          |          |          |          |          |          |           |           |           |           |           |

Patient Name: \_\_\_\_\_ Age: \_\_\_\_\_ Sex: \_\_\_\_\_ ID Number: \_\_\_\_\_ 1

Weight: \_\_\_\_\_ kg (children only)

| Vital Signs<br>Date                                                                                                                                                                                      | /                     |                       |                       |                       | /                     |                       |                       |                       | /                     |                       |                       |                       | /                     |                       |                       |                       |
|----------------------------------------------------------------------------------------------------------------------------------------------------------------------------------------------------------|-----------------------|-----------------------|-----------------------|-----------------------|-----------------------|-----------------------|-----------------------|-----------------------|-----------------------|-----------------------|-----------------------|-----------------------|-----------------------|-----------------------|-----------------------|-----------------------|
|                                                                                                                                                                                                          | AM                    | AFT                   | EVE                   | NITE                  | AM                    | AFT                   | EVE                   | NITE                  | AM                    | AFT                   | EVE                   | NITE                  | AM                    | AFT                   | EVE                   | NITE                  |
| Shift                                                                                                                                                                                                    | 1                     | 1                     | 1                     | 1                     | 2                     | 2                     | 2                     | 2                     | 3                     | 3                     | 3                     | 3                     | 4                     | 4                     | 4                     | 4                     |
| Day                                                                                                                                                                                                      | 1                     | 1                     | 1                     | 1                     | 2                     | 2                     | 2                     | 2                     | 3                     | 3                     | 3                     | 3                     | 4                     | 4                     | 4                     | 4                     |
| Temperature °C (axillary)                                                                                                                                                                                |                       |                       |                       |                       |                       |                       |                       |                       |                       |                       |                       |                       |                       |                       |                       |                       |
| Heart rate / pulse (beats/minute)                                                                                                                                                                        |                       |                       |                       |                       |                       |                       |                       |                       |                       |                       |                       |                       |                       |                       |                       |                       |
| Respiratory rate (breath/minute)                                                                                                                                                                         |                       |                       |                       |                       |                       |                       |                       |                       |                       |                       |                       |                       |                       |                       |                       |                       |
| <b>Treatment: Doctors write in dosage and route under medication name (see formulary), then place circles for when to give medication. Nurses mark an X through the circle when medication is given.</b> |                       |                       |                       |                       |                       |                       |                       |                       |                       |                       |                       |                       |                       |                       |                       |                       |
| ORS                                                                                                                                                                                                      | <input type="radio"/> | <input type="radio"/> | <input type="radio"/> |                       | <input type="radio"/> | <input type="radio"/> | <input type="radio"/> |                       | <input type="radio"/> | <input type="radio"/> | <input type="radio"/> |                       | <input type="radio"/> | <input type="radio"/> | <input type="radio"/> |                       |
| Cefixime                                                                                                                                                                                                 | <input type="radio"/> |                       |                       |                       | <input type="radio"/> |                       |                       |                       | <input type="radio"/> |                       |                       |                       | <input type="radio"/> |                       |                       |                       |
| Coartem                                                                                                                                                                                                  | <input type="radio"/> |                       | <input type="radio"/> |                       | <input type="radio"/> |                       | <input type="radio"/> |                       | <input type="radio"/> |                       | <input type="radio"/> |                       |                       |                       |                       |                       |
| Paracetamol                                                                                                                                                                                              | <input type="radio"/> | <input type="radio"/> | <input type="radio"/> | <input type="radio"/> | <input type="radio"/> | <input type="radio"/> | <input type="radio"/> | <input type="radio"/> | <input type="radio"/> | <input type="radio"/> | <input type="radio"/> | <input type="radio"/> | <input type="radio"/> | <input type="radio"/> | <input type="radio"/> | <input type="radio"/> |
| Omeprazole                                                                                                                                                                                               | <input type="radio"/> |                       |                       |                       | <input type="radio"/> |                       |                       |                       | <input type="radio"/> |                       |                       |                       | <input type="radio"/> |                       |                       |                       |
| Vitamin A                                                                                                                                                                                                | <input type="radio"/> |                       |                       |                       | <input type="radio"/> |                       |                       |                       |                       |                       |                       |                       |                       |                       |                       |                       |
| Vitamin C                                                                                                                                                                                                | <input type="radio"/> | <input type="radio"/> | <input type="radio"/> |                       | <input type="radio"/> | <input type="radio"/> | <input type="radio"/> |                       | <input type="radio"/> | <input type="radio"/> | <input type="radio"/> |                       | <input type="radio"/> | <input type="radio"/> | <input type="radio"/> |                       |
| Extra ORS                                                                                                                                                                                                |                       |                       |                       |                       |                       |                       |                       |                       |                       |                       |                       |                       |                       |                       |                       |                       |
| Ringers Lactate                                                                                                                                                                                          |                       |                       |                       |                       |                       |                       |                       |                       |                       |                       |                       |                       |                       |                       |                       |                       |
| Morphine sulfate                                                                                                                                                                                         |                       |                       |                       |                       |                       |                       |                       |                       |                       |                       |                       |                       |                       |                       |                       |                       |
| Morphine HCL                                                                                                                                                                                             |                       |                       |                       |                       |                       |                       |                       |                       |                       |                       |                       |                       |                       |                       |                       |                       |
| Metoclopramide                                                                                                                                                                                           |                       |                       |                       |                       |                       |                       |                       |                       |                       |                       |                       |                       |                       |                       |                       |                       |
| Zinc Sulfate                                                                                                                                                                                             |                       |                       |                       |                       |                       |                       |                       |                       |                       |                       |                       |                       |                       |                       |                       |                       |
| Diazepam                                                                                                                                                                                                 |                       |                       |                       |                       |                       |                       |                       |                       |                       |                       |                       |                       |                       |                       |                       |                       |
| Lorazepam                                                                                                                                                                                                |                       |                       |                       |                       |                       |                       |                       |                       |                       |                       |                       |                       |                       |                       |                       |                       |
| Chlorpromazine                                                                                                                                                                                           |                       |                       |                       |                       |                       |                       |                       |                       |                       |                       |                       |                       |                       |                       |                       |                       |
| Halperidol                                                                                                                                                                                               |                       |                       |                       |                       |                       |                       |                       |                       |                       |                       |                       |                       |                       |                       |                       |                       |
| Ceftriaxone                                                                                                                                                                                              |                       |                       |                       |                       |                       |                       |                       |                       |                       |                       |                       |                       |                       |                       |                       |                       |
| Ciprofloxacin                                                                                                                                                                                            |                       |                       |                       |                       |                       |                       |                       |                       |                       |                       |                       |                       |                       |                       |                       |                       |
|                                                                                                                                                                                                          |                       |                       |                       |                       |                       |                       |                       |                       |                       |                       |                       |                       |                       |                       |                       |                       |
|                                                                                                                                                                                                          |                       |                       |                       |                       |                       |                       |                       |                       |                       |                       |                       |                       |                       |                       |                       |                       |

Outbreak  
Case ID:

# LABORATORY FORM

Patient's Surname: \_\_\_\_\_ Other Names: \_\_\_\_\_

Age: \_\_\_\_\_  Years  Months

Gender:  Male  Female

Permanent Residence:

Village/Town: \_\_\_\_\_ County: \_\_\_\_\_ Country of Residence: \_\_\_\_\_

Date of Initial Symptom Onset: \_\_\_/\_\_\_/\_\_\_ (D, M, Yr)

Status of Patient at Time Sample Collected:  Alive  Dead *If dead, Date of Death: \_\_\_/\_\_\_/\_\_\_ (D, M, Yr)*

Health Facility Submitting Sample: \_\_\_\_\_ Person Submitting Sample: \_\_\_\_\_

## Section 5. Clinical Specimens and Laboratory Testing

- Specimen/shipping instructions:**
- Label sample with **patient name, date of collection, and case ID**
  - Send sample **cold** with a **cold/ice pack**, and **packaged appropriately**.
  - Collect whole blood in a purple top (EDTA) tube – green or red top tubes acceptable if purple not available
  - **Preferred sample volume = 4ml** (minimum sample volume = 2ml)

Has this patient had a sample submitted previously?  Yes  No

Sample 1:

*Do not complete  
LIVRI Only*

Sample Collection Date: \_\_\_/\_\_\_/\_\_\_ (D, M, Yr)

Sample Type:

- Whole Blood  
 Post-mortem heart blood  
 Skin biopsy  
 Other specimen type, specify: \_\_\_\_\_

Sample 2:

*Do not complete  
LIVRI Only*

Sample Collection Date: \_\_\_/\_\_\_/\_\_\_ (D, M, Yr)

Sample Type:

- Whole Blood  
 Post-mortem heart blood  
 Skin biopsy  
 Other specimen type, specify: \_\_\_\_\_



**TRIAGE FORM – INTERNATIONAL MEDICAL CORPS – LUNSAR EBOLA TREATMENT CENTRE**

**DATE:** \_\_\_\_ / \_\_\_\_ / 20\_\_\_\_  
DD / MM / YYYY

**PATIENT ID #:** LU- [ ] - [ ] [ ] [ ] [ ] [ ]  
LU-2 = Triage; LU-3 = Confirmed; LU-4 = morgue

Form completed by (write your name): \_\_\_\_\_

Where did patient come from?  Ambulance  Referral  Walk-in

Where is the patient being triaged?  Ambulance/Community  ETC Triage tent

**BASIC PATIENT INFORMATION**

Information provided by:  Patient  Someone else

*If Someone else:* Relation to patient: \_\_\_\_\_

Patient name: Surname \_\_\_\_\_ First name \_\_\_\_\_

Estimated age: [ ]  YEARS  MONTHS (for children under 1 year)

Sex:  Male  Female Height: \_\_\_\_\_ cm Weight: \_\_\_\_\_ kg Z-Score: \_\_\_\_\_

Address: District \_\_\_\_\_ Chiefdom \_\_\_\_\_ Town/village \_\_\_\_\_

**SYMPTOMS & CONTACT HISTORY**

**Date when symptoms started:** \_\_\_\_\_

|                            |     |    |                      |                              |
|----------------------------|-----|----|----------------------|------------------------------|
| <b>Fever</b>               | Yes | No | <b># days:</b> _____ | <b>Temperature:</b> _____ °c |
| <b>Headache</b>            | Yes | No |                      |                              |
| <b>Nausea</b>              | Yes | No |                      |                              |
| <b>Vomit</b>               | Yes | No | <b>Bloody</b>        | Yes No                       |
| <b>Diarrhoea</b>           | Yes | No | <b>Bloody</b>        | Yes No                       |
| <b>Haemorrhagic eyes</b>   | Yes | No |                      |                              |
| <b>Other haemorrhage</b>   | Yes | No | <b>Location:</b>     |                              |
| <b>Breathlessness</b>      | Yes | No |                      |                              |
| <b>Bone/muscle pain</b>    | Yes | No |                      |                              |
| <b>Loss of appetite</b>    | Yes | No |                      |                              |
| <b>Asthenia/weakness</b>   | Yes | No |                      |                              |
| <b>Abdominal pain</b>      | Yes | No |                      |                              |
| <b>Jaundice</b>            | Yes | No |                      |                              |
| <b>Swallowing problems</b> | Yes | No |                      |                              |
| <b>Hiccups</b>             | Yes | No |                      |                              |

**Contact History Last 21 Days** (List contacts in contact tracing form)

|                                            |     |    |
|--------------------------------------------|-----|----|
| Is there somebody ill in the family?       | Yes | No |
| Have you visited someone who is ill?       | Yes | No |
| Has somebody died recently in your family? | Yes | No |
| Have you been to a funeral recently?       | Yes | No |

**Suspicion of EBOLA** Yes No      Ward/Bed # Admitted into \_\_\_\_\_

**TRIAGE FORM – INTERNATIONAL MEDICAL CORPS – LUNSAR EBOLA TREATMENT CENTRE**

**DATE:** \_\_\_\_ / \_\_\_\_ / 20\_\_\_\_  
DD / MM / YYYY

**PATIENT ID #:** LU- [ ] - [ ] [ ] [ ] [ ] [ ]  
LU-2 = Triage; LU-3 = Confirmed; LU-4 = morgue

**ADDITIONAL PATIENT INFORMATION**

(If female) Is the patient pregnant?  YES  NO  UNKNOWN

*If YES,* How far along? \_\_\_\_\_

Is the patient a healthcare worker (anyone involved with patient e.g. nurse, hospital cleaner, ambulance driver)?  YES  NO  UNKNOWN

*If YES,* Position \_\_\_\_\_ Name of facility \_\_\_\_\_

Location of facility: District \_\_\_\_\_ Town/Village \_\_\_\_\_

*If NO,* Specify occupation \_\_\_\_\_

Did the patient visit another health centre or traditional healer for this illness (including pharmacy)?

YES  NO  UNKNOWN

*If YES,* Name of facility \_\_\_\_\_ District \_\_\_\_\_

Date visited other facility (DD/MM/YYYY) [ ][ ]/[ ][ ]/2014  UNKNOWN

Patient ID # in other facility \_\_\_\_\_

Location where patient became ill: District \_\_\_\_\_

Village \_\_\_\_\_ Chiefdom \_\_\_\_\_

**ADDITIONAL MEDICAL INFORMATION**

**Additional medical problems, chronic conditions, and current medications?**

Yes  No  Unknown

Describe:

Patient ID \_\_\_\_\_

Patient Name: \_\_\_\_\_

Has the patient had contact with someone with FHF or someone who has been ill recently?

| Name of FHF contact | Relationship | Date of contact | Type of contact* | Phone Number | Village/Chiefdom |
|---------------------|--------------|-----------------|------------------|--------------|------------------|
|                     |              |                 |                  |              |                  |
|                     |              |                 |                  |              |                  |
|                     |              |                 |                  |              |                  |
|                     |              |                 |                  |              |                  |
|                     |              |                 |                  |              |                  |
|                     |              |                 |                  |              |                  |
|                     |              |                 |                  |              |                  |
|                     |              |                 |                  |              |                  |
|                     |              |                 |                  |              |                  |
|                     |              |                 |                  |              |                  |
|                     |              |                 |                  |              |                  |
|                     |              |                 |                  |              |                  |
|                     |              |                 |                  |              |                  |
|                     |              |                 |                  |              |                  |
|                     |              |                 |                  |              |                  |

\*In case of contact with someone with FHF (or probable FHF), what was the closest contact:

- 1 - Slept in same house within the last 21 days.
- 2 - Had direct physical contact.
- 3 - Touched their body fluids (excreta, vomit etc.)
- 4 - Had sexual relations.
- 5 - Handled clothes or other personal objects.
- 6 - Suckled patient or breast-fed from patient.
- 7 - Contact with body at a funeral

8 - Contact with the mattress, clothing or coffin of body during funeral practices.  
(Not including contact with rope for lowering the coffin nor touching earth during burial.)

## DRUG REQUEST FORM – IMC – LUNSAR EBOLA TREATMENT CENTRE

DATE: [ ][ ]/[ ][ ]/[ ][ ][ ]/ 20\_\_  
(DD/MM/YYYY)

PATIENT ID #: LU- [ ][ ] - [ ][ ][ ][ ][ ][ ]  
LU-2 = Triage; LU-3 = Confirmed; LU-4 = morgue

### BASIC PATIENT INFORMATION

Ward #: \_\_\_\_\_ Bed #: \_\_\_\_\_

Name: Surname \_\_\_\_\_ Given names \_\_\_\_\_

Sex:  Male  Female Age [ ][ ]  years or  months (for children < 1 y)

Is patient pregnant?  YES or  NO/UNKNOWN

*If YES*, which trimester:  first  second  third

### PRESCRIBER INFORMATION

Name of prescriber: \_\_\_\_\_ Prescriber ID #: \_\_\_\_\_

### MEDICATION

#### Antimalarials

- Artemether-Lumefantrine (ACT)
- Artusunate
- Artemether

#### Antibiotics

- Ceftriaxone
- Cefixime
- Metronidazole

#### Analgesics/Antipyretics

- Paracetamol
- Tramadol
- Morphine

#### Other

- Vitamin A
- Vitamin C
- Zinc sulphate
- Diazepam
- Ondansetron
- Haloperidol
- Chlorpromazine
- Ivermectin
- Omeprazole
- Ranitidine
- Other (list) \_\_\_\_\_

LAB REQUEST FORM – IMC – LUNSAR EBOLA TREATMENT CENTRE

DATE: \_\_\_\_ / \_\_\_\_ / 20\_\_  
DD / MM / YYYY

PATIENT ID #: LU- [ ] - [ ] [ ] [ ] [ ] [ ]  
LU-2 = Triage; LU-3 = Confirmed; LU-4 = morgue

**BASIC PATIENT INFORMATION**

Ward #: \_\_\_\_\_ Bed #: \_\_\_\_\_

Name: Surname \_\_\_\_\_ Given names \_\_\_\_\_

Sex:  Male  Female

Age: \_\_\_\_\_  YEARS or  MONTHS (for children under 1 year)

**PRESCRIBER INFORMATION**

Name of clinician: \_\_\_\_\_ Clinician Signature: \_\_\_\_\_

Position:  Doctor in charge  Head nurse  Community Health Officer

**BLOOD DRAW INFORMATION**

Blood Samples Drawn by: \_\_\_\_\_ Signature: \_\_\_\_\_

Date blood Drawn: \_\_\_\_ / \_\_\_\_ / 20\_\_ Time Blood Drawn: \_\_\_\_ : \_\_\_\_ : \_\_\_\_  
DD / MM / YYYY Hr : Min : AM/PM

**LAB TESTS (PHE)**

New admission (Malaria RDT + Ebola PCR)

Repeat Ebola PCR

**LAB TESTS (MoD)**

FBC/CBC

Urea and electrolytes (U+Es)

[Urea; Creatinine; Sodium; Potassium]

Liver function tests

[bilirubin – conjugated/unconjugated; AST, ALT]

Albumin

Calcium

Amylase

Glucose

Lactate

Clotting screen

Group and X-Match

Urinalysis

Blood culture

Store Serum

Other (specify): \_\_\_\_\_

Provider Name:

Patient Names

Date/Time:

|  |  |  |  |  |  |
|--|--|--|--|--|--|
|  |  |  |  |  |  |
|--|--|--|--|--|--|

|                             |                        |         |         |         |         |         |
|-----------------------------|------------------------|---------|---------|---------|---------|---------|
| <b>Vital Signs</b>          | Temperature °C         |         |         |         |         |         |
|                             | Heart rate / pulse     |         |         |         |         |         |
|                             | Respiratory rate       |         |         |         |         |         |
|                             | Consciousness          | A V P U | A V P U | A V P U | A V P U | A V P U |
| <b>Signs &amp; Symptoms</b> | Urine frequency        |         |         |         |         |         |
|                             | Stool frequency        |         |         |         |         |         |
|                             | 1. Did patient eat?    |         |         |         |         |         |
|                             | 2. Did patient drink?  |         |         |         |         |         |
|                             | 3. Headache            |         |         |         |         |         |
|                             | 4. Bone/muscle pain    |         |         |         |         |         |
|                             | 5. Stomach pain        |         |         |         |         |         |
|                             | 6. Weakness            |         |         |         |         |         |
|                             | 7. Anorexia            |         |         |         |         |         |
|                             | 8. Swallowing problems |         |         |         |         |         |
|                             | 9. Nausea              |         |         |         |         |         |
|                             | 10. Vomiting           |         |         |         |         |         |
|                             | 11. Diarrhoea          |         |         |         |         |         |
|                             | 12. Breathlessness     |         |         |         |         |         |
|                             | 13. Red/injected eyes  |         |         |         |         |         |
| 14. Non-hemorrhagic rash    |                        |         |         |         |         |         |
| 15. Hiccups                 |                        |         |         |         |         |         |

Provider Name:

Patient Names

Date/Time:

|  |  |  |  |  |  |
|--|--|--|--|--|--|
|  |  |  |  |  |  |
|--|--|--|--|--|--|

|                                      |                                                        |                                                                                  |                                                                                  |                                                                                  |                                                                                  |                                                                                  |
|--------------------------------------|--------------------------------------------------------|----------------------------------------------------------------------------------|----------------------------------------------------------------------------------|----------------------------------------------------------------------------------|----------------------------------------------------------------------------------|----------------------------------------------------------------------------------|
| <b>Signs &amp; Symptoms (Cont'd)</b> | 16. Bleeding                                           | None<br>Nose/Oral<br>Cough<br>Vomit<br>Stool<br>Vaginal (non-menstrual)<br>Other | None<br>Nose/Oral<br>Cough<br>Vomit<br>Stool<br>Vaginal (non-menstrual)<br>Other | None<br>Nose/Oral<br>Cough<br>Vomit<br>Stool<br>Vaginal (non-menstrual)<br>Other | None<br>Nose/Oral<br>Cough<br>Vomit<br>Stool<br>Vaginal (non-menstrual)<br>Other | None<br>Nose/Oral<br>Cough<br>Vomit<br>Stool<br>Vaginal (non-menstrual)<br>Other |
|                                      | 17. Other (describe)                                   |                                                                                  |                                                                                  |                                                                                  |                                                                                  |                                                                                  |
| <b>Clinical Notes</b>                | Notes                                                  |                                                                                  |                                                                                  |                                                                                  |                                                                                  |                                                                                  |
| <b>Treatment</b>                     | Treatment<br><br>(Write in any additional medications) | Standing Orders                                                                  | Standing Orders                                                                  | Standing Orders                                                                  | Standing Orders                                                                  | Standing Orders                                                                  |

| <b>Ward/<br/>Bed #</b> | <b>Name / ID</b> | <b>Temp<br/>C</b> | <b>Heart /<br/>Pulse<br/>rate</b> | <b>Respiratory<br/>Rate</b> | <b>Nurses Notes / Patient Requests</b> |
|------------------------|------------------|-------------------|-----------------------------------|-----------------------------|----------------------------------------|
|                        |                  |                   |                                   |                             |                                        |
|                        |                  |                   |                                   |                             |                                        |
|                        |                  |                   |                                   |                             |                                        |
|                        |                  |                   |                                   |                             |                                        |
|                        |                  |                   |                                   |                             |                                        |
|                        |                  |                   |                                   |                             |                                        |
|                        |                  |                   |                                   |                             |                                        |
|                        |                  |                   |                                   |                             |                                        |
|                        |                  |                   |                                   |                             |                                        |







**DISCHARGE FORM – IMC – LUNSAR EBOLA TREATMENT CENTRE**

DATE: \_\_\_\_ / \_\_\_\_ / 20\_\_\_\_  
DD / MM / YYYY

PATIENT ID #: LU- [ ] - [ ] [ ] [ ] [ ] [ ]  
LU-2 = Triage; LU-3 = Confirmed; LU-4 = morgue

**COMPLETE FORM UPON DEATH OF PATIENT, DISCHARGE, or TRANSFER**

Final outcome:  Deceased  Discharged  Transferred to other facility

*If Deceased*, date of death: \_\_\_\_ / \_\_\_\_ / 20\_\_\_\_  
DD / MM / YYYY

date transferred to morgue: \_\_\_\_ / \_\_\_\_ / 20\_\_\_\_  
DD / MM / YYYY

date of burial: \_\_\_\_ / \_\_\_\_ / 20\_\_\_\_  
DD / MM / YYYY

*If Discharged*,

Discharge type:  By staff  Self-discharged  Removed by family  Unknown

Did the patient have a confirmed negative test for Ebola?  YES  NO

*If yes*,  never had Ebola (discharged from suspect ward)  
OR

recovered from Ebola (discharged from recovery ward)

Discharge medications provided?

*If yes*, list medications \_\_\_\_\_

*If Transferred to other facility*,

Reason for transfer: \_\_\_\_\_

Name of new facility: \_\_\_\_\_

District/town of new facility: \_\_\_\_\_

Discharge medications provided?

*If yes*, list medications \_\_\_\_\_

Refer to psychosocial Team upon completion

Form completed by (print name): \_\_\_\_\_

Signature: \_\_\_\_\_
